# Supplementary material
Source: publisher figshare collection journal article supplement (https://gsajournals.figshare.com/ndownloader/files/22116750)
Supplement: Supplementary file 1 [file 22116750]

| Sensilla | Head Neurons (Anterior Axons) | Head Neurons (Posterior Axons) | Head Neurons (Ring) | Pharynx | Nerve Cord | Hypodermal and Body Wall Muscle | Gut | Tail Neurons | Other |
| --- | --- | --- | --- | --- | --- | --- | --- | --- | --- |
| CEPshDR/L | BAGL | ALA | AIYR/L | e3VL | DA6 | hyp 3 (2) | B | DVA | CANR |
| CEPsoVR | RIPR | AVAL | RIH | g1AL | DA7 | hyp 8/9 | exc_cell | LUAR |  |
| IL1VL | URBR/L | AVBR/L | RIS | pm2VL | DA9 | hyp10 (2) | F | PDA |  |
| IL2 | URYDR/L | AVDR/L | RIVR/L | pm4VL | DB4 | mu_bod (3) | mu_anal | PHAR |  |
| IL2VL |  | AVER/L | RMDVR/L | pm5VL |  |  | mu_int_L | PHshR/L |  |
| ILshDR/L |  | AVHR | RMEL | pm7VL |  |  | mu_sph | PVCR |  |
| ILshR/L |  | AVL |  |  |  |  | rect_VR/L | PVPR/L |  |
| ILshVR/L |  | REML |  |  |  |  | U | AINR/L |  |
| ILsoDR/L |  | RID |  |  |  |  |  |  |  |
| ILsoR |  | RMED |  |  |  |  |  |  |  |
| ILsoVR/L |  | RMEV |  |  |  |  |  |  |  |
| OLLL |  | SAADR/L |  |  |  |  |  |  |  |
| OLLshR/L |  | SIADR/L |  |  |  |  |  |  |  |
| OLLsoR |  | SIBVR/L |  |  |  |  |  |  |  |
| OLQDL |  | SMDDR/L |  |  |  |  |  |  |  |
| OLQshSR |  | SMDVL |  |  |  |  |  |  |  |
| OLQshVR/L |  |  |  |  |  |  |  |  |  |
| OLQsoDR/L |  |  |  |  |  |  |  |  |  |
| OLQsoVL |  |  |  |  |  |  |  |  |  |
| AMshR/L |  |  |  |  |  |  |  |  |  |
| AMsoR |  |  |  |  |  |  |  |  |  |

**Table S2.**

**Table S2.** Categorization of inferred terminal cell fates from the *otIs33[kal-1p::GFP]* cell lineage. The majority of cells in the lineage are one cell division away from terminal cell fates. Figure S1 shows a representative cell lineage (n = 4).
